# Supplementary material for: Structure–function correlates of fibrinogen binding by Acinetobacter adhesins critical in catheter-associated urinary tract infections
Source: PubMed Central journal article supplement (PMC9942807; doi:10.1073/pnas.2212694120), 2023-01-18
Supplement: pnas.2212694120.sapp.pdf [file pnas.2212694120.sapp.pdf]

## Supporting Information for

Structure-function correlates of fibrinogen binding by *Acinetobacter* adhesins critical in catheter associated urinary tract infections

Authors: Kevin O. Tamadonfar<sup>1,2\*</sup>, Gisela Di Venanzio<sup>1\*</sup>, Jerome S. Pinkner<sup>1,2</sup>, Karen W. Dodson<sup>1,2</sup>, Vasilios Kalas<sup>1,2</sup>, Maxwell I. Zimmerman<sup>3</sup>, Jesus Bazan Villicana<sup>1,2</sup>, Gregory R. Bowman<sup>4</sup>, Mario F. Feldman<sup>1</sup>, and Scott J. Hultgren<sup>1,2</sup>

Affiliations:

<sup>1</sup>Department of Molecular Microbiology, Washington University School of Medicine, St Louis, MO, USA.

<sup>2</sup>Center for Women's Infectious Disease Research, Washington University School of Medicine, St Louis, MO, USA

<sup>3</sup>Department of Pathology and Immunology, Washington University School of Medicine, St. Louis, MO 63110, USA

<sup>4</sup>Department of Biochemistry & Molecular Biophysics, Department of Biomedical Engineering, and Center for Biological Systems Engineering, Washington University School of Medicine, St. Louis, Missouri 63110, United States

\*Co-first authors

Paste Scott J. Hultgren

Email: [hultgren@wustl.edu](mailto:hultgren@wustl.edu)

**This PDF file includes:**

Figures S1 to S5

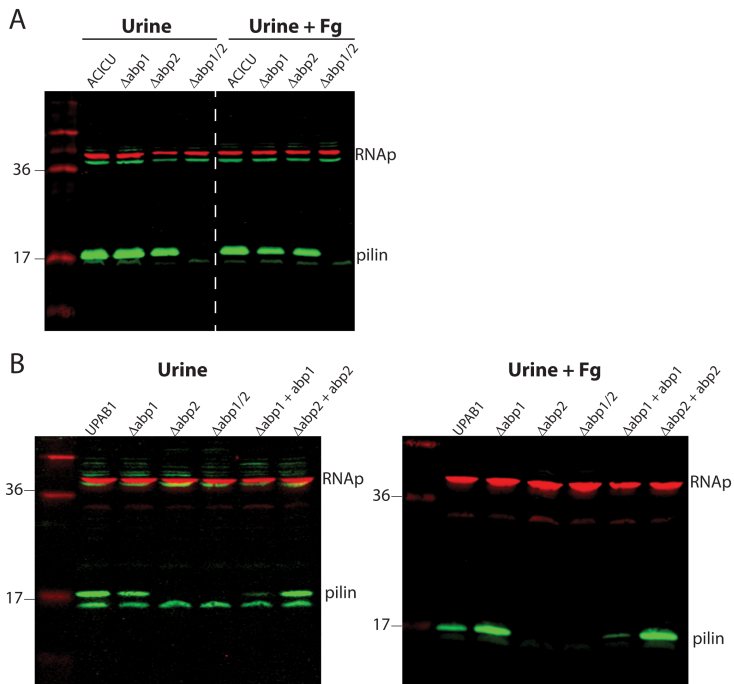

**Fig S1: UPAB1 and ACICU expression of Abp1 and Abp2 pili.** A) Western blot against the pilin domains of Abp1 and Abp2 pili for WT and mutants of A) ACICU in urine and urine with fibrinogen and B) UPAB1 in urine and urine with fibrinogen.

**Percent Identities of CUP adhesin RBDs**

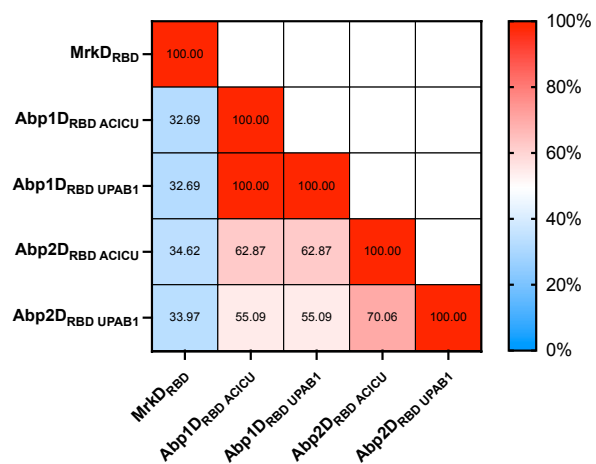

**Fig S2: Primary amino acid sequence of various receptor binding domain alleles.** Percent identity determined by Clustal Omega from sequences aligned in Figure 3A. MrkD sequence from PDB: 3U4K.

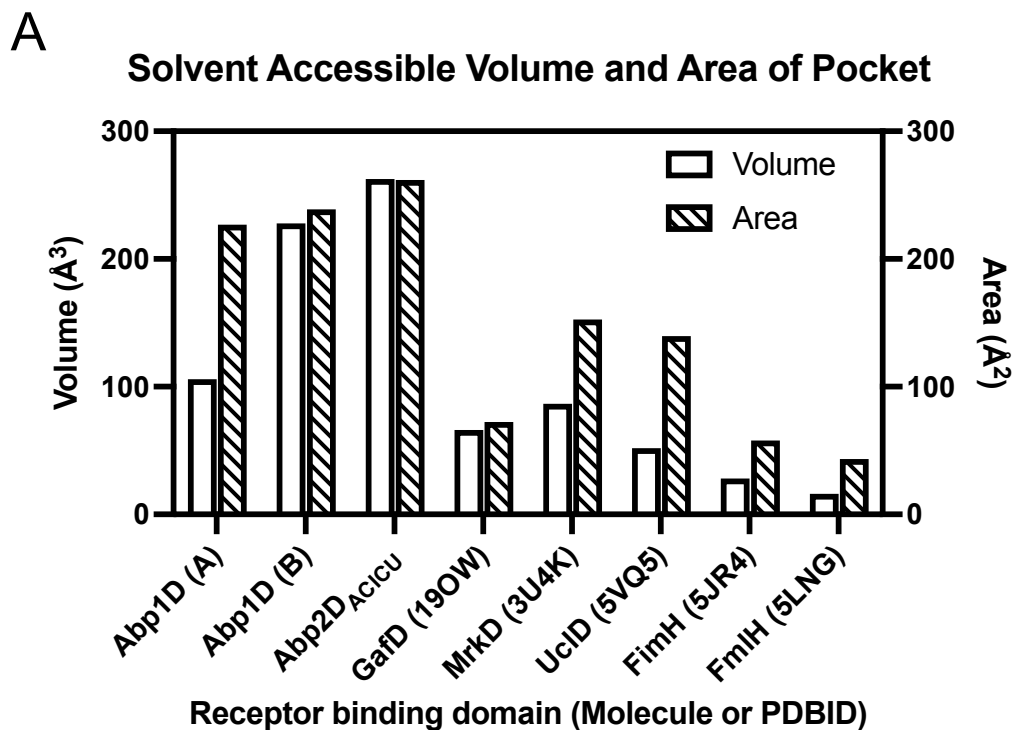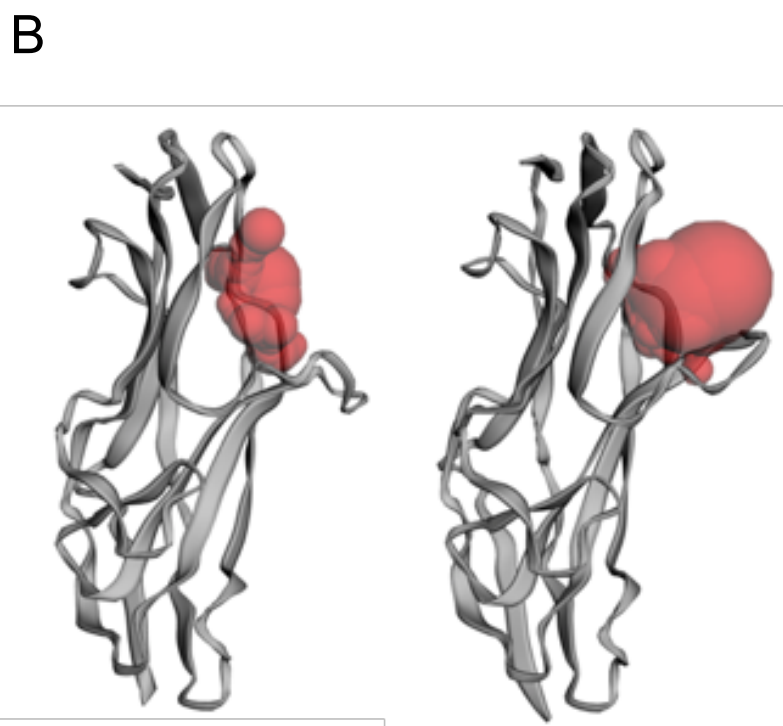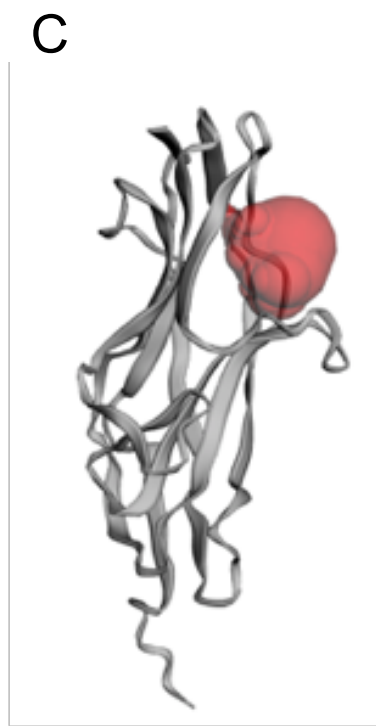

**Fig S3: Binding Pocket Volume of  $\gamma 4$  and  $\gamma 1$  CUP adhesin lectin/receptor binding domains.** *In silico* calculation by CASTp. A) Quantification of solvent accessible volume and surface area. Visual representation of binding pocket volume in Red of B) two molecules of Abp1D<sub>RBD</sub> (Molecules A and B from left to right) and C) Abp2D<sub>RBD</sub>.

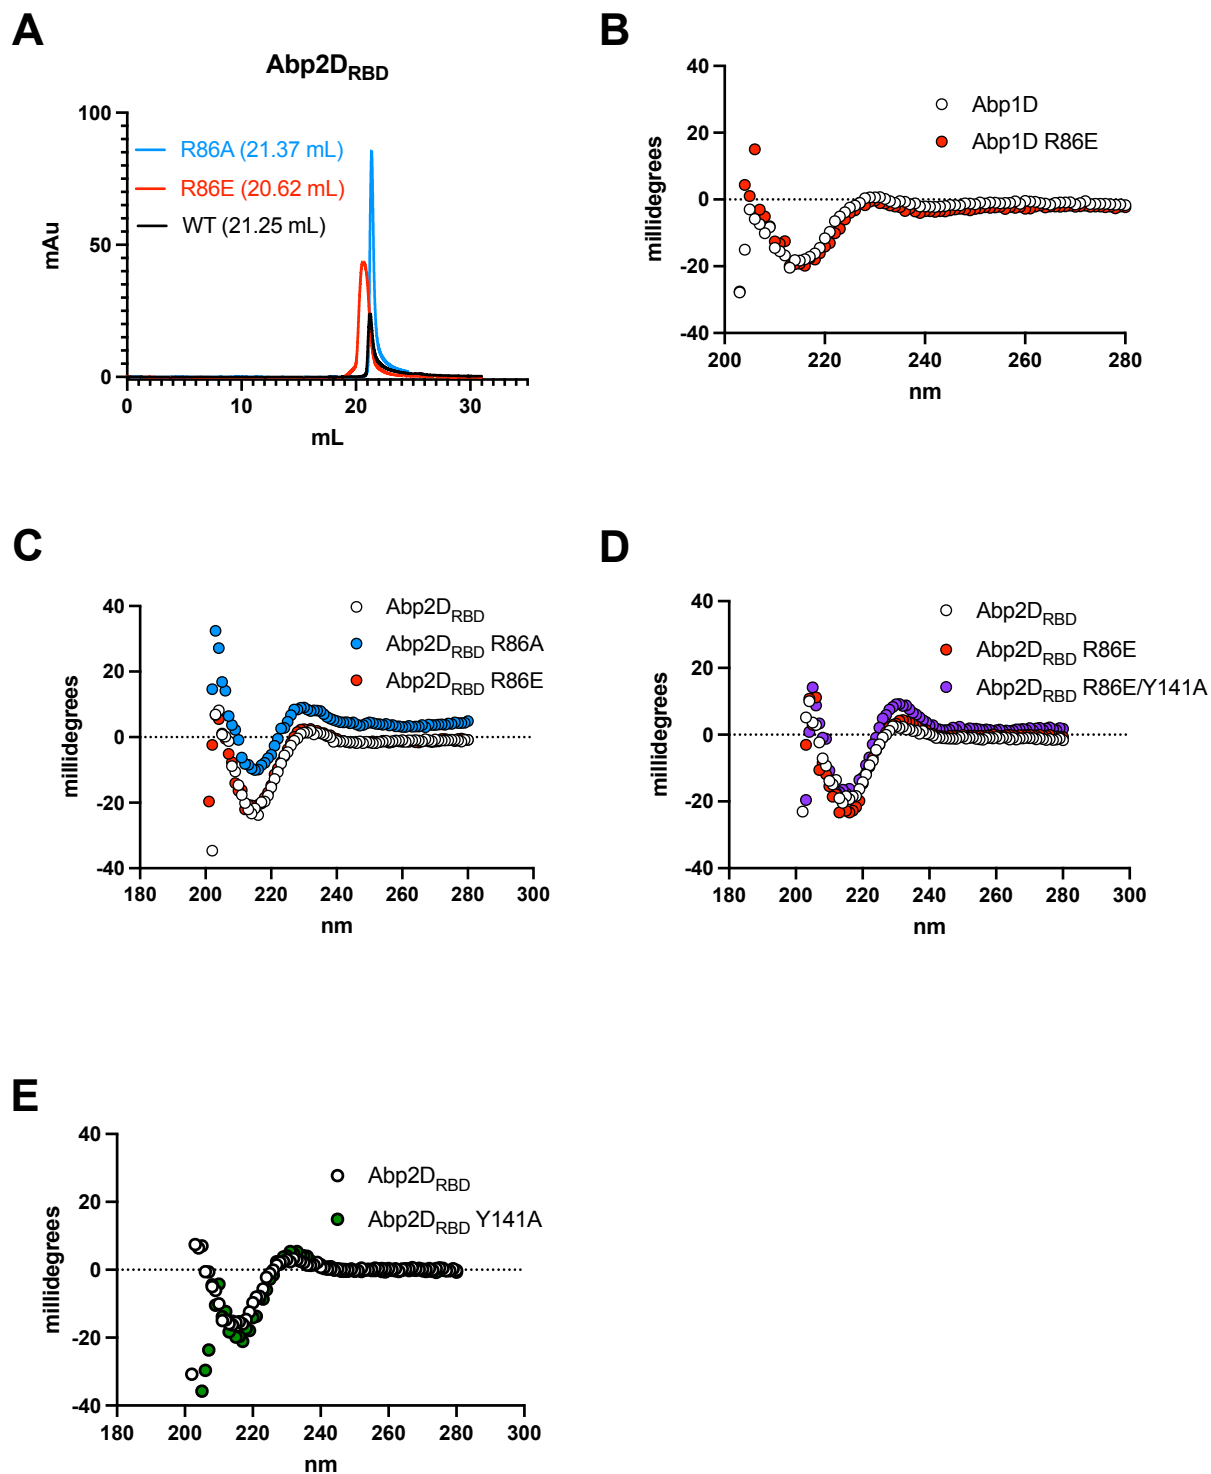

**Fig S4: Mutants of the Abp1D and Abp2D RBDs are appropriately folded.** A) Size exclusion chromatography profiles of Abp2D<sub>RBD</sub> WT and R86 mutants. Proteins suspended 20 mM MES 5.79 + 50 mM NaCl. Assayed on Superdex 200 column. In parentheses, elution volume of respective peaks. B-E) Circular dichroism spectra of Abp1D and Abp2D<sub>ACICU</sub> RBD mutants in 20 mM Phosphate 7.00.

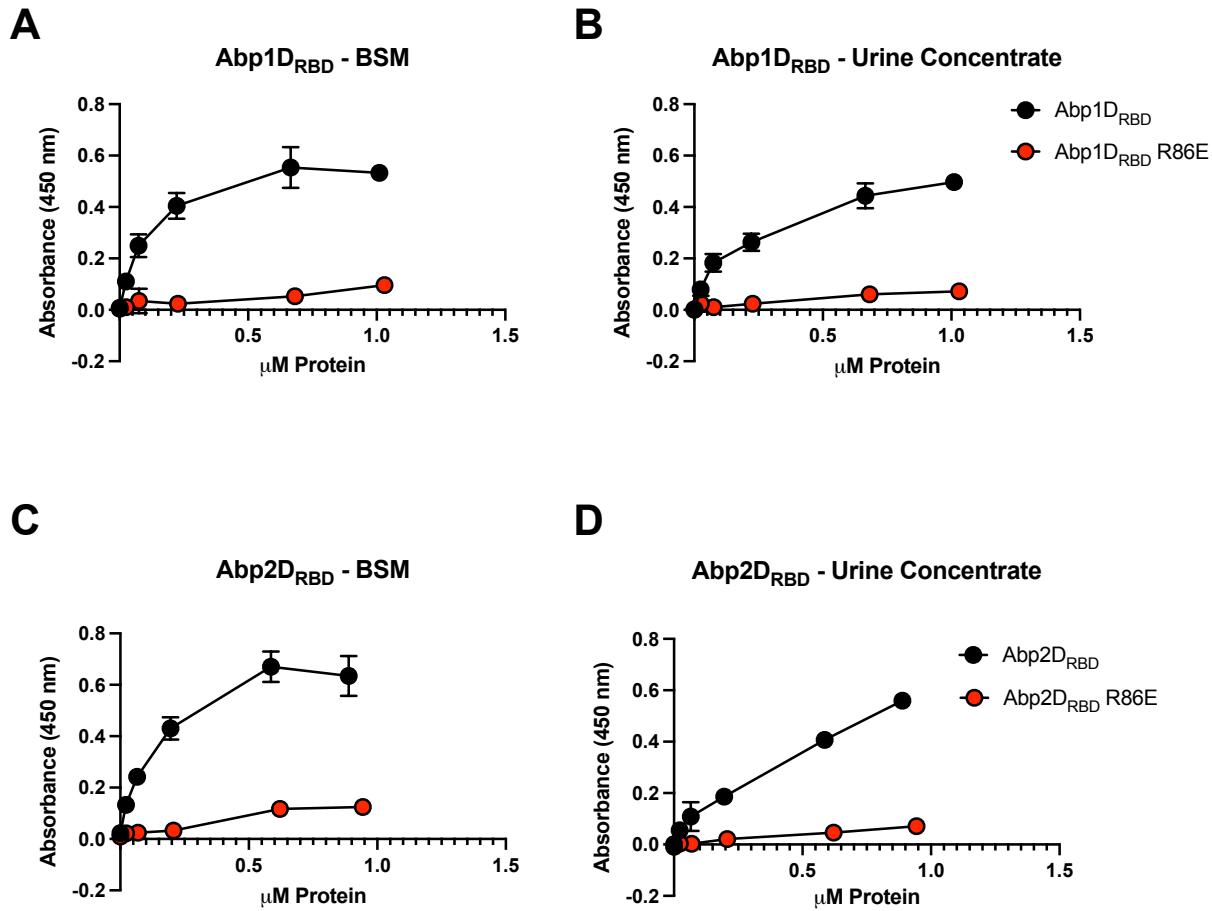

**Fig S5: Repertoire of RBD binding.** Abp2D<sub>RBD</sub> binding to A) bovine submaxillary mucin and B) urine concentrate and Abp1D<sub>RBD</sub> binding to C) bovine submaxillary mucin and D) urine concentrate. Biotinylated Abp2D<sub>RBD</sub> and Abp2D<sub>RBD</sub> R86E tested for binding to set of glycoproteins by ELISA. n=4 with a background (n=1) subtracted.

**Table S1:** Refinement Statistics.

|                                | Abp1D<br>RBD                          | Abp2D<br>RBD                            | Abp2D R86E RBD                   |
|--------------------------------|---------------------------------------|-----------------------------------------|----------------------------------|
| Resolution range               | 44.51 -<br>2.1 (2.175<br>- 2.1)       | 47.53 -<br>1.29<br>(1.336 -<br>1.29)    | 43.8 - 1.9 (1.968 - 1.9)         |
| Space group                    | P 42 2 2                              | P 41 21 2                               | P 21 21 21                       |
| Unit cell                      | 91.97<br>91.97<br>176.915<br>90 90 90 | 51.176<br>51.176<br>128.236<br>90 90 90 | 36.438 51.847 81.828<br>90 90 90 |
| Total reflections              | 629264<br>(61626)                     | 505499<br>(19435)                       | 89401 (8836)                     |
| Unique reflections             | 45137<br>(4370)                       | 42203<br>(2806)                         | 12772 (1230)                     |
| Multiplicity                   | 13.9<br>(14.0)                        | 12.0 (6.0)                              | 7.0 (7.2)                        |
| Completeness (%)               | 99.76<br>(99.36)                      | 94.96<br>(65.35)                        | 99.95 (99.92)                    |
| Mean I/sigma(I)                | 11.90<br>(0.97)                       | 15.92<br>(0.63)                         | 15.46 (3.17)                     |
| Wilson B-factor                | 33.97                                 | 10.38                                   | 22.32                            |
| R-merge                        | 0.2715<br>(2.938)                     | 0.1305<br>(2.07)                        | 0.1146 (0.8869)                  |
| R-meas                         | 0.2818<br>(3.049)                     | 0.1364<br>(2.266)                       | 0.124 (0.9574)                   |
| R-pim                          | 0.07507<br>(0.8113)                   | 0.03882<br>(0.8954)                     | 0.04693 (0.3571)                 |
| CC1/2                          | 0.996<br>(0.434)                      | 0.999<br>(0.41)                         | 0.998 (0.804)                    |
| CC*                            | 0.999<br>(0.778)                      | 1 (0.763)                               | 0.999 (0.944)                    |
| Reflections used in refinement | 45041<br>(4370)                       | 41657<br>(2804)                         | 12768 (1230)                     |
| Reflections used for R-free    | 2257<br>(212)                         | 2041<br>(141)                           | 581 (61)                         |
| R-work                         | 0.2258<br>(0.2972)                    | 0.2028<br>(0.3137)                      | 0.2117 (0.2518)                  |
| R-free                         | 0.2394<br>(0.3031)                    | 0.2073<br>(0.3522)                      | 0.2403 (0.2545)                  |
| CC(work)                       | 0.945<br>(0.716)                      | 0.952<br>(0.710)                        | 0.950 (0.859)                    |
| CC(free)                       | 0.936<br>(0.791)                      | 0.958<br>(0.616)                        | 0.927 (0.859)                    |
| Number of non-hydrogen atoms   | 2575                                  | 1507                                    | 1282                             |
| macromolecules                 | 2524                                  | 1372                                    | 1257                             |
| ligands                        | 51                                    | 31                                      |                                  |
| solvent                        | 335                                   | 104                                     | 25                               |
| Protein residues               | 0.01                                  | 175                                     | 165                              |

|                           |       |       |       |
|---------------------------|-------|-------|-------|
| RMS(bonds)                | 1.35  | 0.008 | 0.009 |
| RMS(angles)               | 99.09 | 1.27  | 1.16  |
| Ramachandran favored (%)  | 0.91  | 97.66 | 98.76 |
| Ramachandran allowed (%)  | 0     | 2.34  | 1.24  |
| Ramachandran outliers (%) | 2.1   | 0     | 0     |
| Rotamer outliers (%)      | 1.59  | 1.95  | 0     |
| Clashscore                | 38.82 | 0     | 4.03  |
| Average B-factor          | 38.93 | 13.71 | 28.45 |
| macromolecules            | 33.58 | 13.11 | 28.55 |
| ligands                   | 1     | 22.58 |       |
| solvent                   |       | 19.03 | 23.62 |
| Number of TLS groups      |       | 1     | 1     |



**Table S2:** Primer list

|                                    |                                                                                                                   |
|------------------------------------|-------------------------------------------------------------------------------------------------------------------|
| <b>Abp1 DS F FRT</b>               | <b>ATAATGTGTATGATCATTGACTTTTTTAGTATTAATTAATAAATTATTTCATTCTAT<br/>AAAGCCTACTACTTACTACTAAGATCTAGTGTTTAGAAGAAATA</b> |
| <b>Abp1 US R FRT</b>               | AAAATAATTTTCATGATGTTTTACCATATGGTATAAATTAATAAATAAAAACCGCATT<br>ATCAATAAAAAATAACCAATCAAATACATAAAAAATATAATGTT        |
| <b>Abp1 out F</b>                  | GCAAATTGTGATCTATTTCCC                                                                                             |
| <b>Abp1 ut R</b>                   | CCAAACTCCAGATGATCTTTTATTG                                                                                         |
| <b>Abp2 US R Frt</b>               | TTTGTTTTAAAAAGTGTTAGCATTGTTACACTTTTCAAGATGTCAAACACTGGA<br>AAAGTAAGGAATTAACCTTTTATCCAGACTTTTGAGAAAACACT            |
| <b>Abp2 DS F frt</b>               | ATATTCCTATCGAGTTAAGTATGAAATTTTTAGAAAGTAAAAGTTATTATTAATAT<br>TTAATTATTTGAAAATTATTAATTTTATTAACCTATTGAATATGA         |
| <b>Abp2 out F</b>                  | ATGTGACTTTTTGGCTAGCC                                                                                              |
| <b>Abp2 out R</b>                  | TCTTATCTCTATGATTCCTTTCTTC                                                                                         |
| <b>Abp1prom inf Fw</b>             | CTCACTAGTGGATCCCAAACCTCCAGATGATCTTTTATTG                                                                          |
| <b>Abp1comp inf Rv</b>             | ACCGGGCCCAAGCTTCTAATCATATTGGATCGTTACCG                                                                            |
| <b>Abp2 prom Fw</b>                | CTCACTAGTGGATCCGAAGCTGGCAAAAGAGTG                                                                                 |
| <b>Abp2 comp rv</b>                | ACCGGGCCCAAGCTTATTCCTATCGAGTTAAGTATG                                                                              |
| <b>BamHI pEX18 Fw</b>              | GGATCCCCGGGTACC                                                                                                   |
| <b>HindIII pEX18 Rv</b>            | AAGCTTGGCACTGGC                                                                                                   |
| <b>US Fw</b><br><b>Abp1_ACICU</b>  | GCCAGTGCCAAGCTTGAAGAATTGCCAGTTAGAAG                                                                               |
| <b>US Rv Abp</b><br><b>1_ACICU</b> | ATTGAATATTTTGGGCATTTCTTATAAACGCTAGAGC                                                                             |
| <b>DS Fw Abp</b><br><b>1_ACICU</b> | CCCAAAATATTCAATAAATATCGC                                                                                          |

|                                    |                                      |
|------------------------------------|--------------------------------------|
| <b>DS Rv Abp</b><br><b>1_ACICU</b> | GGTACCCGGGGATCCTTAGGTGAAAGCCGTGAAG   |
| <b>US Fw Abp</b><br><b>2_ACICU</b> | GCCAGTGCCAAGCTTTGCTACAGATTTCTTAAATCC |
| <b>US Rv Abp</b><br><b>2_ACICU</b> | TCATATTCAATAGTTTTTAAACC              |
| <b>DS Fw Abp</b><br><b>2_ACICU</b> | AACTATTGAATATGATATGTGACCCGTATCTCAC   |
| <b>DS Rv Abp</b><br><b>2_ACICU</b> | GGTACCCGGGGATCCATCAGTAAAAGCCGATACTC  |
